# Supplementary material for: Interleukin-10 regulates the inflammasome-driven augmentation of inflammatory arthritis and joint destruction
Source: PubMed Central journal article supplement (PMC4292830; doi:10.1186/s13075-014-0419-y), 2014-08-30
Supplement: 13075_2014_419_MOESM1_ESM.pdf [file 13075_2014_419_MOESM1_ESM.pdf]

## Additional file 1- Oligonucleotide primers for real-time PCR

All sequences are listed in the 5'-3' direction

| Name               | Sequence                 |
|--------------------|--------------------------|
| 18S forward        | GTAACCCGTTGAACCCCAT      |
| 18S reverse        | CCATCCAATCGGTAGTAGCG     |
| Aim 2 forward      | ACAAAGTGCGAGGAAGGAGA     |
| Aim 2 reverse      | TCACTCCACACTTTTCATGTCA   |
| ASC forward        | GCAGCTGACTTCCTGGTCT      |
| ASC reverse        | ACGACTCCAGATAGTAGCTGACA  |
| Acp5 forward       | CAGCCCTTATTACCGTTTGC     |
| Acp5 reverse       | GAATTGCCACACAGCATCAC     |
| CathepsinK forward | TGTCTGAGAACTATGGCTGTGG   |
| CathepsinK reverse | ATACGGGTAACGTCTTCAGAG    |
| Caspase 1 forward  | ACGCCATGGCTGACAAGATCCTG  |
| Caspase 1 reverse  | GGTCCCGTGCCTTGTCCATAGC   |
| Caspase 12 forward | AGGATGATGGACCTCAGAAG     |
| Caspase 12 reverse | TCTCAGACTCCGACAGTTAG     |
| IL-1b forward      | CAACCAACAAGTGATATTCTCCAT |
| IL-1b reverse      | GGGTGTGCCGTCTTTCATTA     |
| IL-6 forward       | ATGGATGCTACCAAAGTGGAT    |
| IL-6 reverse       | TGAAGGACTCTGGCTTTGTCT    |
| IL-18 forward      | GCCATGTCAGAAGACTCTTGCGT  |
| IL-18 reverse      | GTACAGTGAAGTCGGCCAAAGTT  |
| IL-33 forward      | GATGGGAAGAAGGTGATGGGTG   |
| IL-33 reverse      | TTGTGAAGGACGAAGAAGGC     |
| Nlrp1 forward      | ATGTGGACCCAACCTTCAAA     |
| Nlrp1 reverse      | GTACGTGCTCCTGGAAAGGT     |
| Nlrp3 forward      | GCACCAACCGGAGCCTCACT     |
| Nlrp3 reverse      | CAGCGCCCCAACCACAGTCT     |
| NOD1 forward       | GGTTCTCTGCCTCTCCACTG     |
| NOD1 reverse       | ATCAGGGGAATCTGCTTGAC     |
| NOD2 forward       | GGTTCTCTGCCTCTCCACTG     |
| NOD2 reverse       | ATCAGGGGAATCTGCTTGAC     |
| RIGI forward       | CTGCCTCACTCTTCCTCCAG     |
| RIGI reverse       | TGGCTTCACAAAGTCCACAG     |
| TNF forward        | AGCCAGGAGGGGAGAACAGA     |
| TNF reverse        | CAGTGAGTGAAAGGGACAGAAC   |
